# Supplementary material for: MiR-377 promotes white adipose tissue inflammation and decreases insulin sensitivity in obesity via suppression of sirtuin-1 (SIRT1)
Source: PubMed Central journal article supplement (PMC5642576; doi:10.18632/oncotarget.19742), 2017-07-31
Supplement: oncotarget-08-70550-s001.pdf [file oncotarget-08-70550-s001.pdf]

# MiR-377 promotes white adipose tissue inflammation and decreases insulin sensitivity in obesity via suppression of sirtuin-1 (SIRT1)

## SUPPLEMENTARY MATERIALS

A

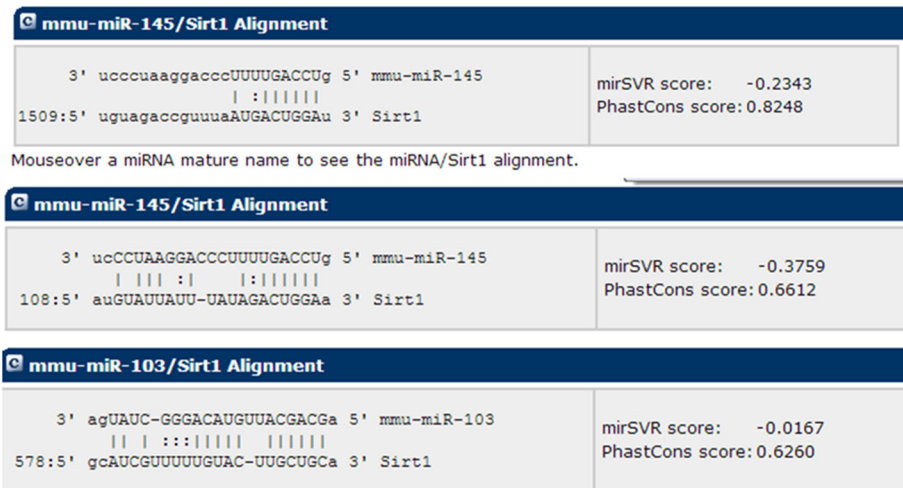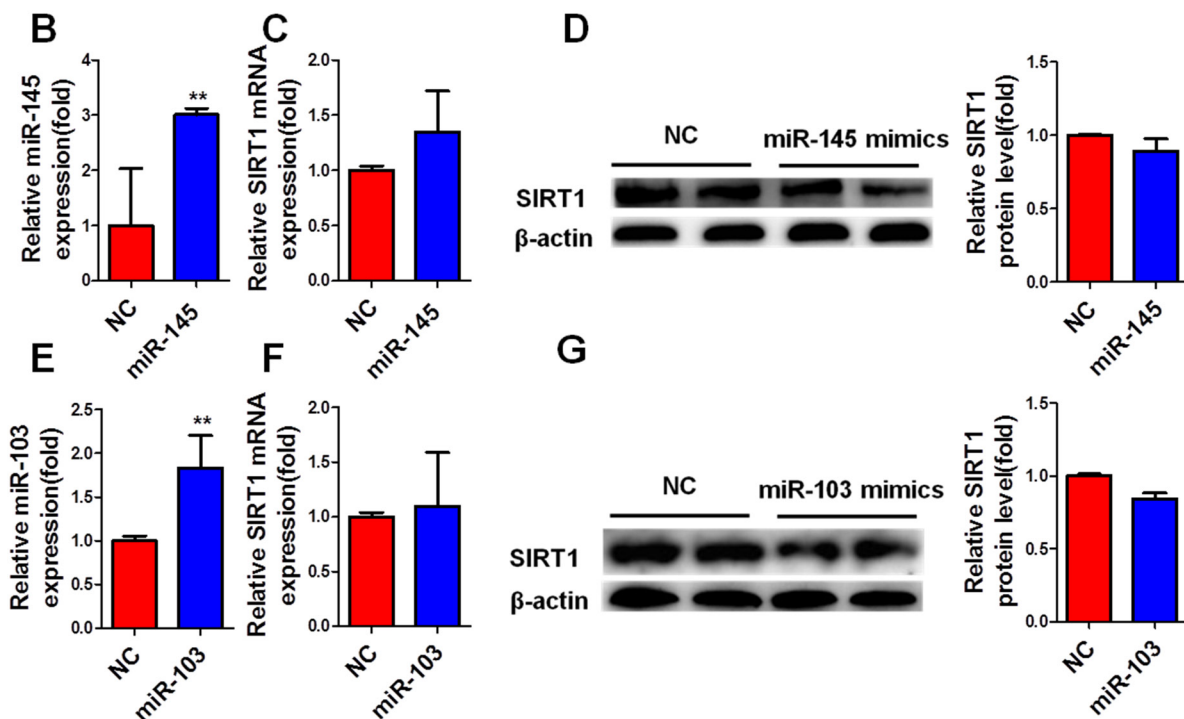

**Supplementary Figure 1: Overexpression of miR-145 and miR-103 did not inhibit the translation of SIRT1 in differentiated 3T3-L1 cells.** (A) The potential target sites were predicted by MICRORNA. (B–G) Mature 3T3-L1 cells were transfected with 100 nM miR-145 or miR-103 mimics, respectively, for 24 h and then harvested for real-time PCR and immunoblotting analyses. (B) MiR-145 expression. (C) SIRT1 mRNA levels. (D) SIRT1 protein levels. (E) MiR-103 expression. (F) SIRT1 mRNA levels. (G) SIRT1 protein levels.  $**P < 0.01$  vs. NC (n=3).

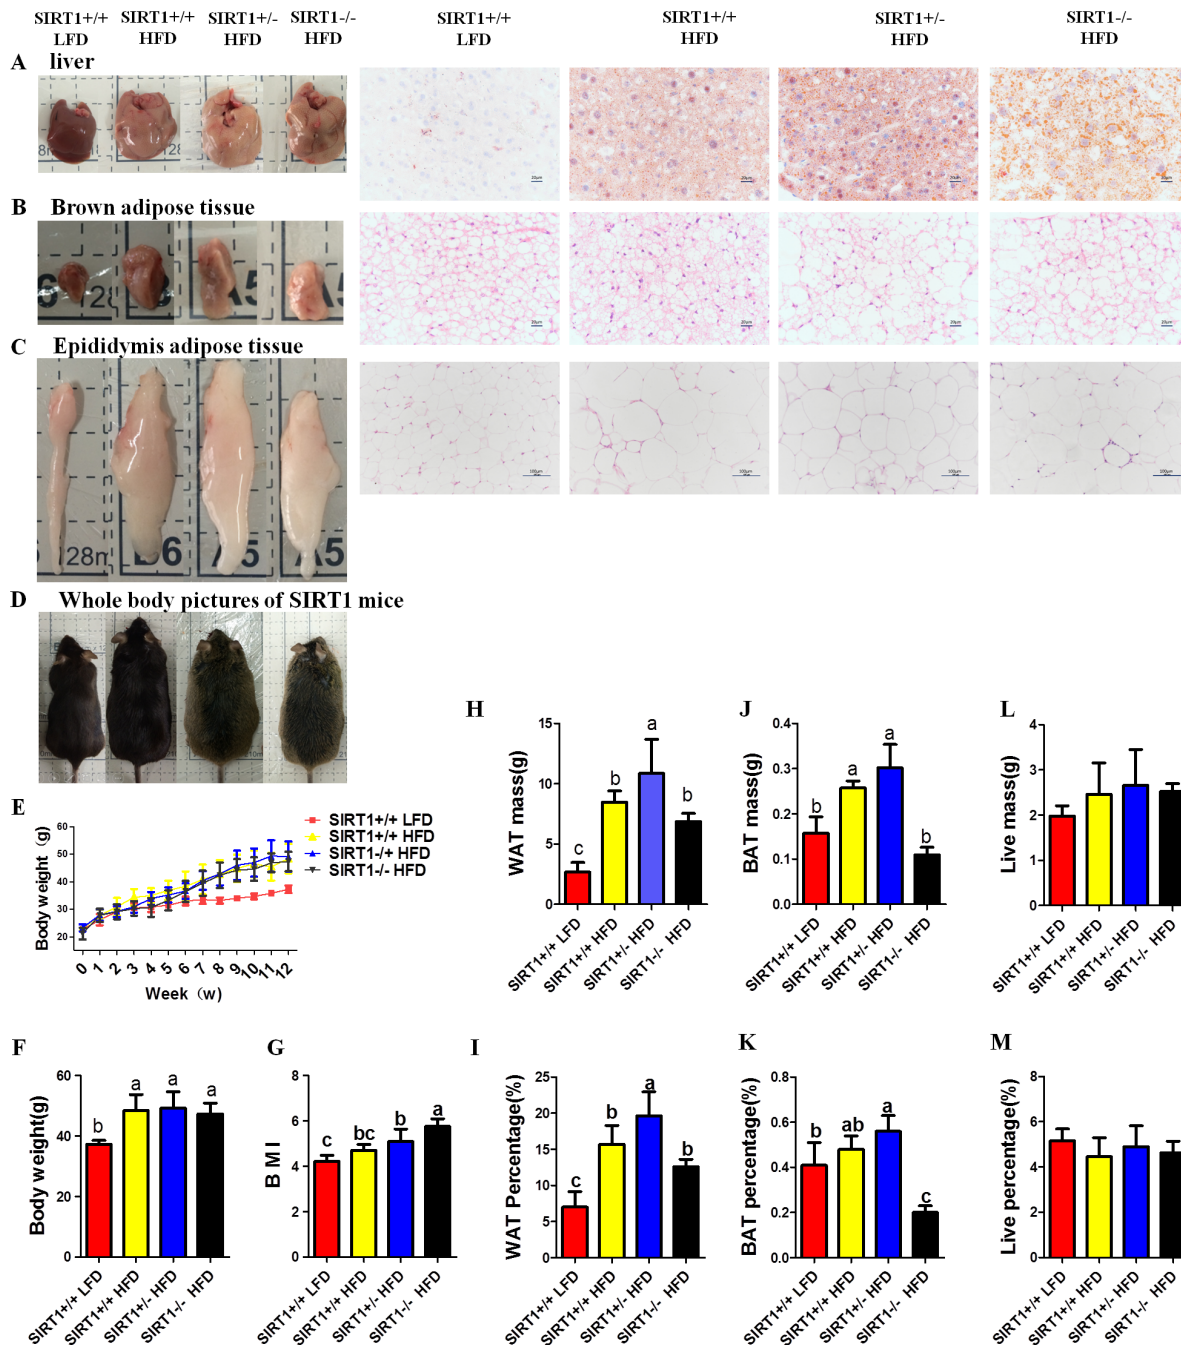

**Supplementary Figure 2: SIRT1-deficiency affects adipogenesis and results in hepatic steatosis in HFD-fed mice.** Mice with different genotypes received a LFD or a HFD for 12 weeks. **(A)** Livers and oil red-O staining of liver tissue; scale bar, 20  $\mu$ m (n=3). **(B)** Brown adipose tissue (BAT) and histological (hematoxylin and eosin) staining of sections; scale bar, 20  $\mu$ m (n=3). **(C)** Epididymal adipose tissue and histological (hematoxylin and eosin) staining of sections; scale bar, 100  $\mu$ m (n=3). **(D)** Whole body images of SIRT1 mice. **(E)** Body weight during 12 weeks of HFD (n=6-8). **(F)** Body weight at week 12 (n=6-8). **(G)** Body mass index (BMI) (n=6-8). **(H and I)** White adipose tissue mass and percentage (n=6-8). **(J and K)** BAT mass and percentage. **(L and M)** Liver mass and percentage (n=6-8). Different letters denote significant differences, P < 0.05.

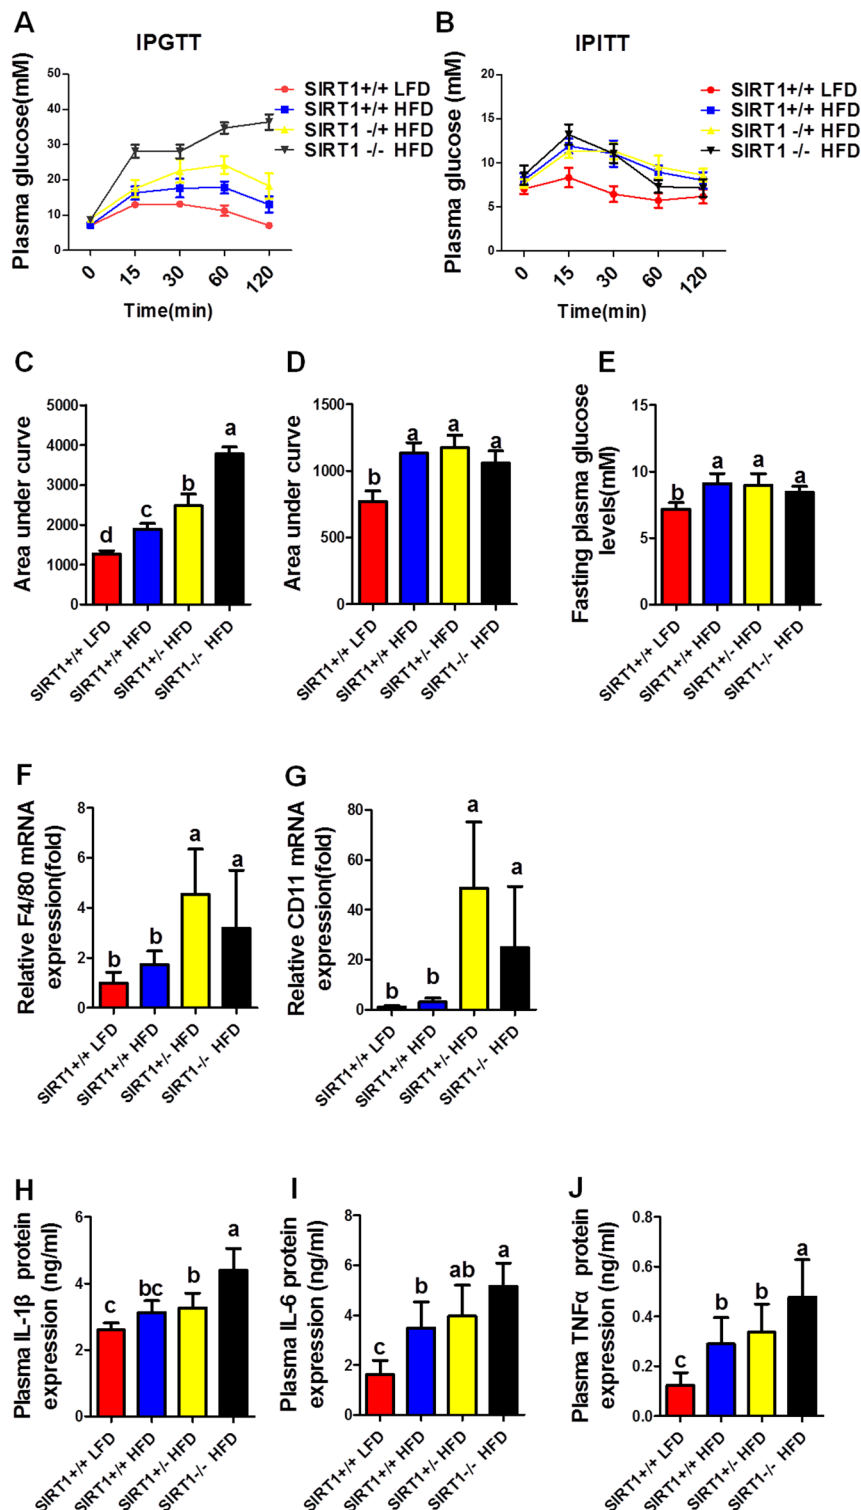

**Supplementary Figure 3: SIRT1-deficiency intensifies adipose tissue inflammation and insulin-resistance in HFD-fed mice.** Mice with different genotypes received a LFD or a HFD for 12 weeks prior to IPGTT or IPITT evaluation (n = 6–8). (A) IPGTT, 2 g/kg glucose. (B) IPITT, 0.6 IU/kg insulin. (C) Area under the curve from IPGTT. (D) Area under the curve from IPITT. (E) Fasting plasma glucose. (F and G) mRNA levels of macrophage specific antigen F4/80 and CD11 from epididymal adipose tissue. (H–J) Serum levels of inflammatory factors IL-1β and IL-6 and TNFα. Different letters denote significant differences, P < 0.05.

Supplementary Table 1: The primer used in this study

| Gene           | Forward Primer                                                | Reverse Primer                   |
|----------------|---------------------------------------------------------------|----------------------------------|
| F4/80          | 5' AGGGCAGGGATCTTGTTATG 3'                                    | 5' AGCTGCACTCTGTAAGGACAC 3'      |
| Sirt1          | 5' CCTGACTTCAGATCAAGAGACGGTA 3'                               | 5' CTGATTAAAAATGTCTCCACGAACAG 3' |
| CD11           | 5' TGGATGCAGAGAAGCTGACAC 3'                                   | 5' CAACCACCACCCAGGAAC TAT 3'     |
| $\beta$ -actin | 5' GGCACCACACCTTCTACAATG 3'                                   | 5' GGGGTGTTGAAGGTCTCAAAC 3'      |
| TNF $\alpha$   | 5' CGGAGTCCGGGCAGGTCTACTTT 3'                                 | 5' GTCCAGGTCACTGTCCCAGCATC 3'    |
| IL-1 $\beta$   | 5' CAAGCAATACCCAAAGAAGAAGA 3'                                 | 5' ATTAGAAACAGTCCAGCCCATAC 3'    |
| IL-6           | 5' CCAGAGATACAAAGAAATGATGG 3'                                 | 5' ACTCCAGAAGACCAGAGGAAAT 3'     |
| MCP-1          | 5' AGCACCAGCCAACCTCTCAC 3'                                    | 5' TCTGGACCCATTCCTTCTTG 3'       |
| miR-377-loop   | 5' CTCAACTGGTGTCTGGAGTCGGCAAT<br>TCAGTTGAGACAAAAGT 3'         |                                  |
| miR-377        | 5' GTCGTGGAGTCGGCAATT 3'                                      | 5' GGCATCACACAAAGGCAAC 3'        |
| miR-145-loop   | 5' CTCAACTGGTGTCTGGAGTCGGCAATT<br>CAGTTGAGAGGGATTTC 3'        |                                  |
| miR-145        | 5' CTGGTAGGGTCCAGTTTTTC 3'                                    | 5' TCAACTGGTGTCTGGAG 3'          |
| miR-103-loop   | 5' CTCAACTGGTGTCTGGAGTCGGCA<br>ATTCAGTTGAGTCATAGCCC 3'        |                                  |
| miR-103        | 5' CTGGTAGGAGCAGCATTGTA 3'                                    | 5' TCAACTGGTGTCTGGAG 3'          |
| u6-loop        | 5' CTCAACTGGTGTCTGGAGTCGGCAATTCA<br>GTTGAGAAAAATATGGAACGCT 3' |                                  |
| u6             | 5' CTGGTAGGGTGCTCGCTTCGGCAG 3'                                | 5' CAACTGGTGTCTGGAGTCGGC 3'      |
